# Supplementary material for: [Mo3S13]2− as a Model System for Hydrogen Evolution Catalysis by MoSx: Probing Protonation Sites in the Gas Phase by Infrared Multiple Photon Dissociation Spectroscopy
Source: PubMed Central journal article supplement (PMC7986116; doi:10.1002/anie.202014449), 2021-01-26
Supplement: ANIE-60-5074-s001.pdf [file ANIE-60-5074-s001.pdf]

Supporting Information

**$[\text{Mo}_3\text{S}_{13}]^{2-}$  as a Model System for Hydrogen Evolution Catalysis by  $\text{MoS}_x$ : Probing Protonation Sites in the Gas Phase by Infrared Multiple Photon Dissociation Spectroscopy**

*Aristeidis Baloglou, Manuel Plattner, Milan Ončák,\* Marie-Luise Grutza, Philipp Kurz, and Martin K. Beyer\**

anie\_202014449\_sm\_miscellaneous\_information.pdf

Supporting Information  
©Wiley-VCH 2020  
69451 Weinheim, Germany

**Abstract:** Molybdenum sulfide based materials are known as efficient hydrogen evolution reaction (HER) catalysts. As the binding site for H atoms on molybdenum sulfide for the catalytic process is under debate,  $[\text{HMo}_3\text{S}_{13}]^-$  is an interesting molecular model system. Herein, we probe the  $[\text{HMo}_3\text{S}_{13}]^-$  cluster in the gas phase by coupling Fourier transform ion cyclotron resonance mass spectrometry (FT-ICR MS) with infrared multiple photon dissociation (IRMPD) spectroscopy. Our investigations show one distinct S-H stretching vibration at  $2450\text{ cm}^{-1}$ . Thermochemical arguments based on DFT calculations strongly suggest a terminal disulfide unit as the H adsorption site.

DOI: [10.1002/anie.202014449](https://doi.org/10.1002/anie.202014449) and [10.1002/ange.202014449](https://doi.org/10.1002/ange.202014449)

## SUPPORTING INFORMATION

## Table of Contents

|                                                                |   |
|----------------------------------------------------------------|---|
| Experimental Section.....                                      | 2 |
| [Mo <sub>3</sub> S <sub>13</sub> ] <sup>2-</sup> Geometry..... | 2 |
| Additional Experimental Data.....                              | 3 |
| Additional Computational Data.....                             | 3 |
| References.....                                                | 7 |
| Author Contributions.....                                      | 7 |

## Experimental Section

The experimental setup has been described in detail previously.<sup>[1,2]</sup> Photodissociation spectroscopy was performed in ultrahigh vacuum ( $\approx 10^{-9}$  mbar) inside the ICR cell of a commercial Bruker Apex Qe FT-ICR MS, equipped with a combined electrospray ionization (ESI) and matrix assisted laser desorption ionization (MALDI) Apollo II Dual ESI/MALDI ion source along with a 9.4 T superconducting magnet. Tuneable IR laser light from optical parametric oscillators (OPO) EKSPLA NT277 and NT273, operated at a 1 kHz repetition rate, is guided through a CaF<sub>2</sub> window at the rear end of the vacuum chamber into the ICR cell.<sup>[1,2]</sup> Electrospray ionization of (NH<sub>4</sub>)<sub>2</sub>[<sup>92</sup>Mo<sub>3</sub>S<sub>13</sub>] dissolved in water-methanol (1:1) yields mainly [Mo<sub>3</sub>S<sub>13</sub>]<sup>2-</sup> and [HMo<sub>3</sub>S<sub>13</sub>]. Subsequently the protonated clusters [HMo<sub>3</sub>S<sub>13</sub>]<sup>-</sup> were preselected by a quadrupole mass filter and guided into the ICR cell, where they were trapped for irradiation. The IR photodissociation ratio was obtained by recording a mass spectrum at each set wavelength, yielding an IR action spectrum. The wavelength of the OPO was calibrated with an accuracy of <2 nm by a laser spectrum analyser Ångstrom LSA IRIII L (HighFinesse). (NH<sub>4</sub>)<sub>2</sub>[<sup>92</sup>Mo<sub>3</sub>S<sub>13</sub>] was prepared from isotopically enriched <sup>92</sup>MoO<sub>3</sub> (STB Isotope Germany), following a procedure of Müller et al.,<sup>[3]</sup> as described previously.<sup>[4]</sup> Quantum chemical calculations were performed using the  $\omega$ B97XD functional, with the vibrational scaling factor of 0.957 (see the SI for benchmark calculations). The Gaussian software was used for calculations.<sup>[5]</sup>

[Mo<sub>3</sub>S<sub>13</sub>]<sup>2-</sup> Geometry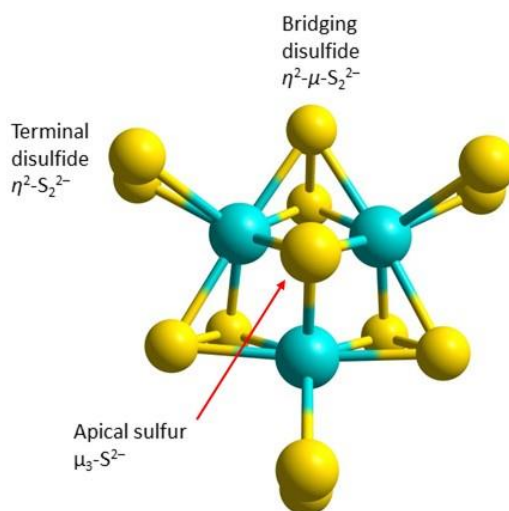

**Figure S1.** Different sulfur moieties of the [Mo<sub>3</sub>S<sub>13</sub>]<sup>2-</sup> cluster.

## SUPPORTING INFORMATION

## Additional Experimental Data

**Table S1.** Gauss functions used to model the experimental data inFigure 3b. Fitting model:  $G(x) = \frac{A}{w\sqrt{\pi/2}} e^{-2\left(\frac{x-x_c}{w}\right)^2}$ 

|    | $x_c / \text{cm}^{-1}$ | $w / \text{cm}^{-1}$ | $A / 10^{-19} \text{ cm}$ | $R^2$ |
|----|------------------------|----------------------|---------------------------|-------|
| G  | $2451.7 \pm 0.1$       | $10.2 \pm 0.2$       | $5.6 \pm 0.1$             | 0.974 |
| G1 | $2449 \pm 5$           | $10 \pm 3$           | $3.1 \pm 3.4$             | 0.984 |
| G2 | $2454 \pm 1$           | $7 \pm 2$            | $2.5 \pm 3.4$             |       |

## Additional Computational Data

Table S2 shows calculations of S–H vibrations for several molecules containing S–H bonds. Based on this calculations, we can conclude that scaling factors of 0.968 and 0.957 for B3LYP and  $\omega$ B97XD from NIST<sup>[6]</sup> lie within 1% of the values calculated for the tested molecules and are therefore used also in our calculations. For the M06, we pick the factor of 0.967.

**Table S2.** Unscaled S–H vibrational frequencies in several molecules along with experiment (in  $\text{cm}^{-1}$ ). The aug-cc-pVTZ basis set was used for all calculations.

|                               | CCSD              | B3LYP             | M06               | $\omega$ B97XD    | exp.                             |
|-------------------------------|-------------------|-------------------|-------------------|-------------------|----------------------------------|
| H <sub>2</sub> S              | 2727.9;<br>2742.8 | 2679.0;<br>2692.1 | 2695.7;<br>2705.9 | 2743.7;<br>2756.2 | 2614.6;<br>2626 <sup>[7]</sup>   |
| H <sub>2</sub> S <sub>2</sub> | 2696.2;<br>2697.8 | 2627.5;<br>2629.6 | 2639.2;<br>2642.2 | 2689.4;<br>2691.2 | 2553.8;<br>2556.6 <sup>[8]</sup> |
| CH <sub>3</sub> SH            | 2742.8            | 2674.3            | 2693.1            | 2735.5            | 2597 <sup>[9]</sup>              |

**Table S3.** Relative energies  $\Delta E$  (in eV) and vibrational frequencies  $\nu$  (in  $\text{cm}^{-1}$ ) calculated for various [HMO<sub>3</sub>S<sub>13</sub>]<sup>-</sup> isomers using the aug-cc-pVTZ(-PP) basis set. Scaling factors of 0.968 (B3LYP), 0.967 (M06) and 0.957 ( $\omega$ B97XD) were used.

| Isomer | $\Delta E$ |      |                | $\nu$ |      |                |
|--------|------------|------|----------------|-------|------|----------------|
|        | B3LYP      | M06  | $\omega$ B97XD | B3LYP | M06  | $\omega$ B97XD |
| A      | 1.26       | 1.31 | 1.31           | 2477  | 2506 | 2552           |
| T1     | 0.00       | 0.00 | 0.00           | 2483  | 2478 | 2513           |
| T2     | 0.10       | 0.09 | 0.09           | 2479  | 2489 | 2509           |
| B      | 1.27       | 1.39 | 1.51           | 2409  | 2411 | 2442           |

## SUPPORTING INFORMATION

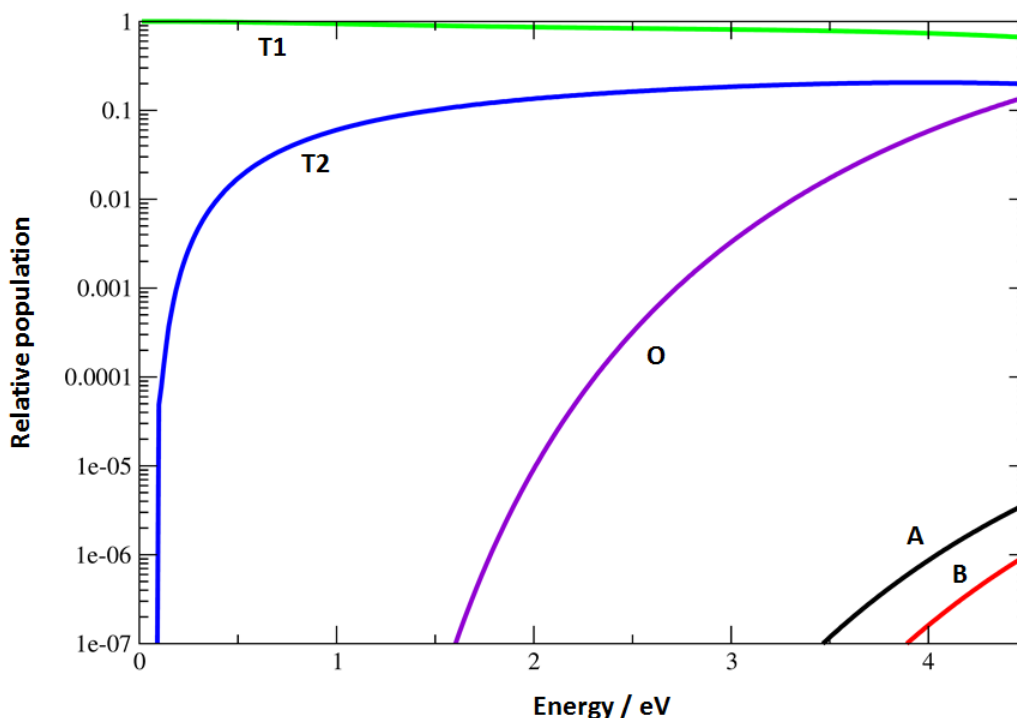

**Figure S2.** Relative population of various  $[\text{HMo}_3\text{S}_{13}]^-$  isomers calculated through the density of states at the B3LYP/aug-cc-pVTZ(-PP) level of theory.

**Cartesian coordinates (in Å) and electronic energies (in a.u.) of various  $\text{HMo}_3\text{S}_{13}^-$  structures optimized using various DFT functionals; see methods for more computational details**

Isomer A, wB97XD

E= -5381.897509

S 0.000239 -0.000415 1.776810  
 Mo -1.498590 -0.530315 0.031039  
 S -1.440442 1.229234 -1.625026  
 S -2.199108 1.878991 0.138971  
 Mo 0.289787 1.562598 0.030637  
 S 2.726452 0.965191 0.136853  
 S 1.784089 0.631809 -1.626596  
 Mo 1.209018 -1.032334 0.030321  
 S -0.345025 -1.859484 -1.625758  
 S -0.527213 -2.844038 0.136658  
 S 0.652128 3.510800 1.391252  
 S 0.718950 3.878458 -0.640770  
 S 3.000020 -2.562659 -0.640232  
 S 2.715182 -2.318846 1.391729  
 S -3.719000 -1.316373 -0.641235  
 S -3.367037 -1.192476 1.390858  
 H 0.003216 -0.000961 3.119923

Isomer T2, wB97XD

E= -5381.942227

S 0.022032 -0.002060 1.807039  
 Mo -1.529411 -0.004816 -0.004760  
 S -0.963314 1.672129 -1.640744  
 S -1.440509 2.477777 0.165665  
 Mo 0.799332 1.350548 0.011270  
 S 2.885296 0.009220 0.086197  
 S 1.902615 0.006634 -1.691818  
 Mo 0.808950 -1.345660 0.010942  
 S -0.948032 -1.674478 -1.644105  
 S -1.425198 -2.489506 0.160282

S 1.768567 2.981633 1.469582  
 S 2.008564 3.424358 -0.538861  
 S 2.032135 -3.412205 -0.537404  
 S 1.787558 -2.969824 1.470690  
 S -3.976551 -0.024272 -0.640639  
 S -3.628344 0.076936 1.380163  
 H -3.709697 -1.224538 1.730308

Isomer T1, wB97XD

E= -5381.945514

S -0.015327 -0.005581 1.799838  
 Mo 1.516065 -0.249743 0.001894  
 S 0.662319 -1.788840 -1.665087  
 S 1.016218 -2.698581 0.125139  
 Mo -1.006593 -1.208731 0.006213  
 S -2.844432 0.453379 0.112355  
 S -1.899505 0.301988 -1.678890  
 Mo -0.578755 1.451464 0.009572  
 S 1.186283 1.478425 -1.665070  
 S 1.821417 2.231330 0.123141  
 S -2.215245 -2.668318 1.469364  
 S -2.548537 -3.046655 -0.538547  
 S -1.466978 3.681871 -0.530626  
 S -1.264005 3.212545 1.475858  
 S 4.019650 -0.631938 -0.505112  
 S 3.457588 -0.542330 1.476205  
 H 4.358726 0.657651 -0.719579

Isomer B, wB97XD

E= -5381.890017

S -0.097476 0.026825 -1.832585  
 Mo 1.334098 -0.728703 -0.046263

## SUPPORTING INFORMATION

S 2.183395 0.582482 1.968813  
 S 2.366707 1.568415 0.152389  
 Mo -0.129773 1.598307 -0.096350  
 S -2.585381 1.379862 0.114525  
 S -1.502179 0.872628 1.782901  
 Mo -1.359851 -0.795413 0.017056  
 S 0.048520 -2.003518 1.570928  
 S 0.039681 -2.846679 -0.274823  
 S 0.054921 3.437477 -1.503972  
 S -0.206453 3.971986 0.443113  
 S -3.386479 -2.040499 0.633040  
 S -3.079937 -1.692072 -1.385710  
 S 3.464691 -1.984489 0.224630  
 S 2.896234 -1.465106 -1.687672  
 H 3.392206 -0.033019 1.984196

## Isomer O, wB97XD

E= -5381.913185  
 S 0.858281 -1.395436 -0.718545  
 Mo 3.008797 -0.550678 0.119527  
 S 4.623850 0.824643 -1.015524  
 S 3.312940 -0.241253 -2.200892  
 S 1.470298 -0.087296 1.888680  
 S 3.106984 1.155919 1.794572  
 Mo -0.449842 0.340210 0.050553  
 S -0.201980 2.630660 0.695121  
 S 0.907161 2.317005 -1.017846  
 Mo -3.109485 -0.478276 -0.116447  
 S -4.975365 0.226454 1.167853  
 S -5.016297 0.734748 -0.846613  
 S -3.232335 -2.509812 -0.636081  
 S -1.755162 -0.333420 1.769982  
 S -1.834749 0.593512 -1.729721  
 S 4.048167 -2.246891 0.736250  
 H 2.133606 2.225902 -0.448403

## Isomer A, B3LYP

E= -5382.158739  
 S -0.000813 0.000336 1.779419  
 Mo 1.582756 -0.348045 0.032644  
 S 0.579995 -1.827340 -1.645113  
 S 0.886290 -2.794592 0.130294  
 Mo -1.092920 -1.196298 0.031758  
 S -2.863531 0.629859 0.127196  
 S -1.871056 0.411382 -1.647303  
 Mo -0.489954 1.544327 0.031472  
 S 1.293163 1.414924 -1.645704  
 S 1.977112 2.164895 0.129449  
 S -2.430317 -2.659455 1.411814  
 S -2.692151 -2.947578 -0.637188  
 S -1.206661 3.805298 -0.636789  
 S -1.089575 3.433262 1.412112  
 S 3.898640 -0.857422 -0.637418  
 S 3.519581 -0.773718 1.411767  
 H -0.005853 0.003049 3.132677

## Isomer T2, B3LYP

E= -5382.201574  
 S 0.025147 -0.002012 1.817437  
 Mo -1.546751 -0.003071 -0.004156  
 S -0.978737 1.693441 -1.656476  
 S -1.460243 2.510795 0.163558  
 Mo 0.816299 1.371517 0.013169  
 S 2.919666 0.004937 0.068192  
 S 1.920768 0.003953 -1.722035  
 Mo 0.822356 -1.368809 0.013201  
 S -0.966082 -1.692437 -1.660018  
 S -1.453761 -2.517120 0.157649  
 S 1.789822 3.000821 1.488828  
 S 2.037385 3.458552 -0.534071  
 S 2.050718 -3.452552 -0.532067

S 1.800198 -2.993931 1.490446  
 S -4.022354 -0.020433 -0.643017  
 S -3.668888 0.083305 1.393807  
 H -3.758197 -1.221869 1.751280

## Isomer T1, B3LYP

E= -5382.205143  
 S -0.018181 -0.004990 1.808468  
 Mo 1.535165 -0.237003 0.001789  
 S 0.695113 -1.801111 -1.684208  
 S 1.058523 -2.723642 0.118246  
 Mo -1.012709 -1.238719 0.006389  
 S -2.880225 0.431287 0.097591  
 S -1.922844 0.285542 -1.709168  
 Mo -0.604909 1.470664 0.009973  
 S 1.190073 1.504916 -1.683103  
 S 1.828237 2.277064 0.115839  
 S -2.205651 -2.708422 1.490965  
 S -2.548275 -3.105484 -0.530596  
 S -1.520977 3.709233 -0.523194  
 S -1.305884 3.223473 1.496895  
 S 4.084436 -0.604057 -0.495879  
 S 3.485578 -0.513732 1.494660  
 H 4.424236 0.691209 -0.706591

## Isomer B, B3LYP

E= -5382.158636  
 S -0.108046 0.028767 -1.842675  
 Mo 1.343798 -0.757260 -0.053766  
 S 2.267408 0.555926 2.000018  
 S 2.391425 1.569775 0.162104  
 Mo -0.113901 1.619036 -0.098360  
 S -2.601582 1.422986 0.109654  
 S -1.514116 0.910991 1.797332  
 Mo -1.393125 -0.795179 0.019626  
 S 0.031976 -2.014433 1.603217  
 S 0.007616 -2.890039 -0.248411  
 S 0.107572 3.482611 -1.511293  
 S -0.173504 4.023293 0.443548  
 S -3.447637 -2.026234 0.636786  
 S -3.123303 -1.679883 -1.398647  
 S 3.485151 -2.050265 0.194007  
 S 2.888613 -1.503280 -1.720098  
 H 3.470413 -0.080512 1.956333

## Isomer A, M06

E= -5381.696964  
 S -0.000653 0.000098 1.789804  
 Mo 1.564838 -0.368530 0.036271  
 S 0.549567 -1.824603 -1.636541  
 S 0.838156 -2.786084 0.129654  
 Mo -1.101625 -1.170715 0.035527  
 S -2.832177 0.667167 0.128729  
 S -1.855062 0.436855 -1.637494  
 Mo -0.463310 1.539172 0.035473  
 S 1.306410 1.387899 -1.636516  
 S 1.993534 2.119286 0.129950  
 S -2.459851 -2.614190 1.393038  
 S -2.712634 -2.884420 -0.641348  
 S -1.140375 3.791589 -0.641254  
 S -1.035169 3.436918 1.393263  
 S 3.853734 -0.907043 -0.642031  
 S 3.494995 -0.823366 1.392685  
 H -0.003530 0.001381 3.143574

## Isomer T2, M06

E= -5381.741559  
 S 0.025315 -0.001964 1.822606  
 Mo -1.538601 -0.006140 0.000253  
 S -0.979896 1.681682 -1.647697  
 S -1.450800 2.489307 0.163457

SUPPORTING INFORMATION

---

Mo 0.806555 1.364497 0.013407  
S 2.901555 0.010839 0.069190  
S 1.908837 0.007633 -1.708731  
Mo 0.817950 -1.358591 0.013529  
S -0.960777 -1.685005 -1.651304  
S -1.433281 -2.501711 0.157981  
S 1.775256 2.994148 1.472773  
S 2.014696 3.437189 -0.536299  
S 2.041784 -3.423032 -0.534098  
S 1.797771 -2.979959 1.474563  
S -3.987514 -0.028894 -0.641637  
S -3.646926 0.077614 1.380031  
H -3.704297 -1.235748 1.724694

## Isomer T1, M06

E= -5381.744950

S -0.017125 -0.005137 1.814650  
Mo 1.522674 -0.269766 0.005812  
S 0.654845 -1.808080 -1.673025  
S 0.987993 -2.724397 0.122154  
Mo -1.030647 -1.209219 0.007645  
S -2.852947 0.489559 0.099173  
S -1.904995 0.324678 -1.695409  
Mo -0.566928 1.472524 0.010582  
S 1.222348 1.470679 -1.672251  
S 1.856086 2.218472 0.122327  
S -2.254967 -2.651977 1.474344  
S -2.594112 -3.027445 -0.533924  
S -1.428926 3.711737 -0.527082  
S -1.230353 3.239317 1.479748  
S 4.017658 -0.675742 -0.507090  
S 3.469753 -0.583871 1.478532  
H 4.341721 0.626678 -0.723991

## Isomer B, M06

E= -5381.693750

S -0.099624 0.028849 -1.848734  
Mo 1.303686 -0.807251 -0.047416  
S 2.212883 0.498612 1.965989  
S 2.462739 1.436001 0.123553  
Mo -0.043074 1.613956 -0.102558  
S -2.521924 1.517642 0.096005  
S -1.471719 0.967620 1.777242  
Mo -1.414049 -0.733594 0.013916  
S -0.055202 -2.003516 1.598056  
S -0.111273 -2.866873 -0.243807  
S 0.250867 3.484968 -1.485959  
S 0.005911 3.980859 0.468240  
S -3.502139 -1.872091 0.628182  
S -3.170929 -1.548862 -1.391904  
S 3.366342 -2.167448 0.232217  
S 2.825251 -1.635004 -1.686255  
H 3.385488 -0.202731 1.989200

## References

- [1] N. K. Bersenkovitsch, M. Ončák, J. Heller, C. van der Linde, M. K. Beyer, *Chem. Eur. J.* **2018**, *24*, 12433.
- [2] A. Herburger, C. van der Linde, M. K. Beyer, *Phys. Chem. Chem. Phys.* **2017**, *19*, 10786.
- [3] A. Müller, V. Wittneben, E. Krickemeyer, H. Bögge, M. Lemke, *Z. Anorg. Allg. Chem.* **1991**, *605*, 175.
- [4] A. Baloglou, M. Ončák, M.-L. Grutza, C. van der Linde, P. Kurz, M. K. Beyer, *J. Phys. Chem. C* **2019**, 8177.
- [5] a) M. J. Frisch, G. W. Trucks, H. B. Schlegel, G. E. Scuseria, M. A. Robb, J. R. Cheeseman, G. Scalmani, V. Barone, G. A. Petersson, H. Nakatsuji et al., *Gaussian 16 Revision B.01*, **2016**; b) M. J. Frisch, G. W. Trucks, H. B. Schlegel, G. E. Scuseria, M. A. Robb, J. R. Cheeseman, G. Scalmani, V. Barone, G. A. Petersson, H. Nakatsuji et al., *Gaussian 16, Revision A.03*, Gaussian Inc., Wallingford CT, **2016**.
- [6] Computational Chemistry Comparison and Benchmark Database. NIST Standard Reference Database Number 101, <http://cccbdb.nist.gov/>, last accessed 5.10.2020.
- [7] T. Shimanouchi, Tables of molecular vibrational frequencies. Consolidated volume I, National Bureau of Standards, Washington, D.C., **1972**.
- [8] E. Isoniemi, L. Khriachtchev, M. Pettersson, M. Räsänen, *Chem. Phys. Lett.* **1999**, *311*, 47.
- [9] I. W. May, E. L. Pace, *Spectrochim. Acta A* **1968**, *24*, 1605.

## Author Contributions

AB: Experimental planning and investigation (lead), data analysis (lead), results discussion (equal), preparation of the manuscript (lead).

MP: Computations (supporting), results discussion (equal).

MO: Computations (lead), results discussion (equal), manuscript editing (lead).

MLG: Chemical synthesis (lead), results discussion (equal).

PK: Project supervision and funding acquisition (lead), results discussion (equal), manuscript editing (supporting).

MKB: Conception of original idea, project supervision and funding acquisition (lead), data validation (lead), results discussion (equal), manuscript editing (lead).
